# Supplementary material
Source: ML conference proceedings conference paper supplement (https://openreview.net/forum?id=FwxOHl0BEl)

Energy vs Time for Bond+LJ loop n=1000

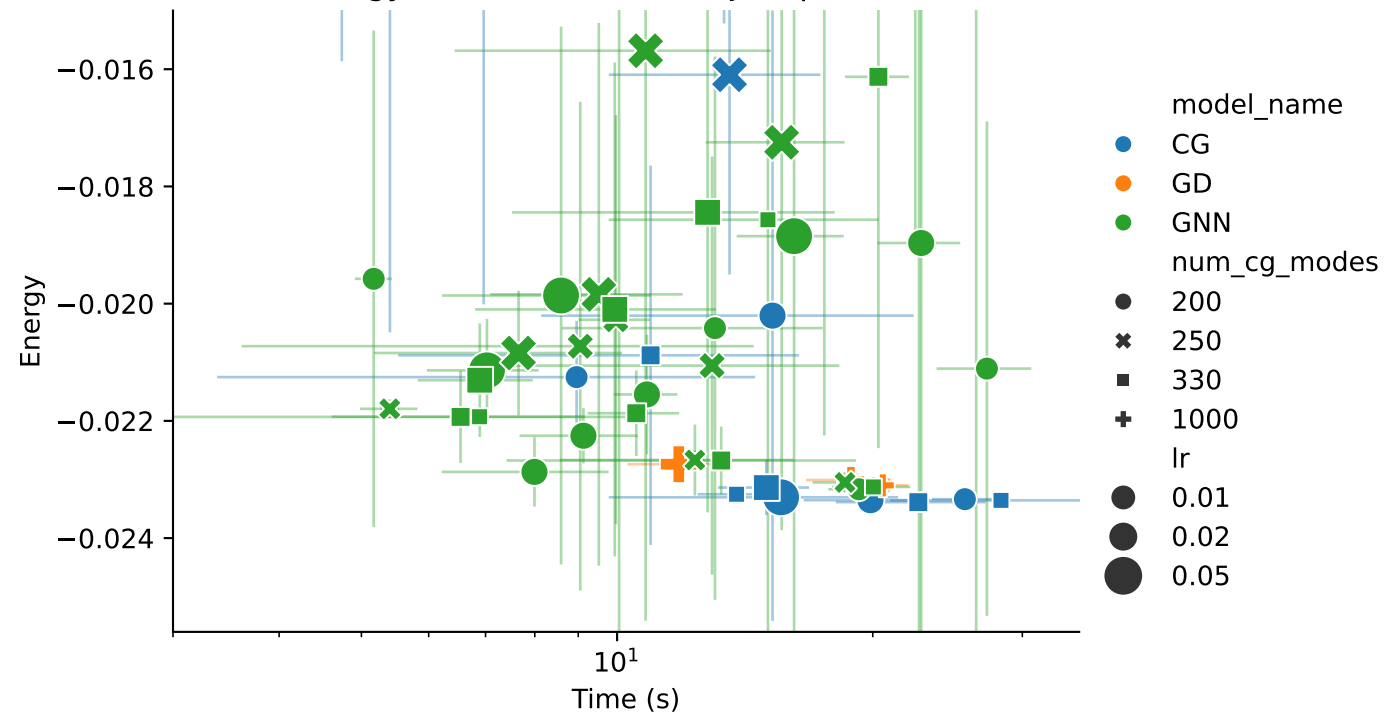

Supplement: supplementary_material [file attachment]

Energy vs Time for LJ loop n=1000

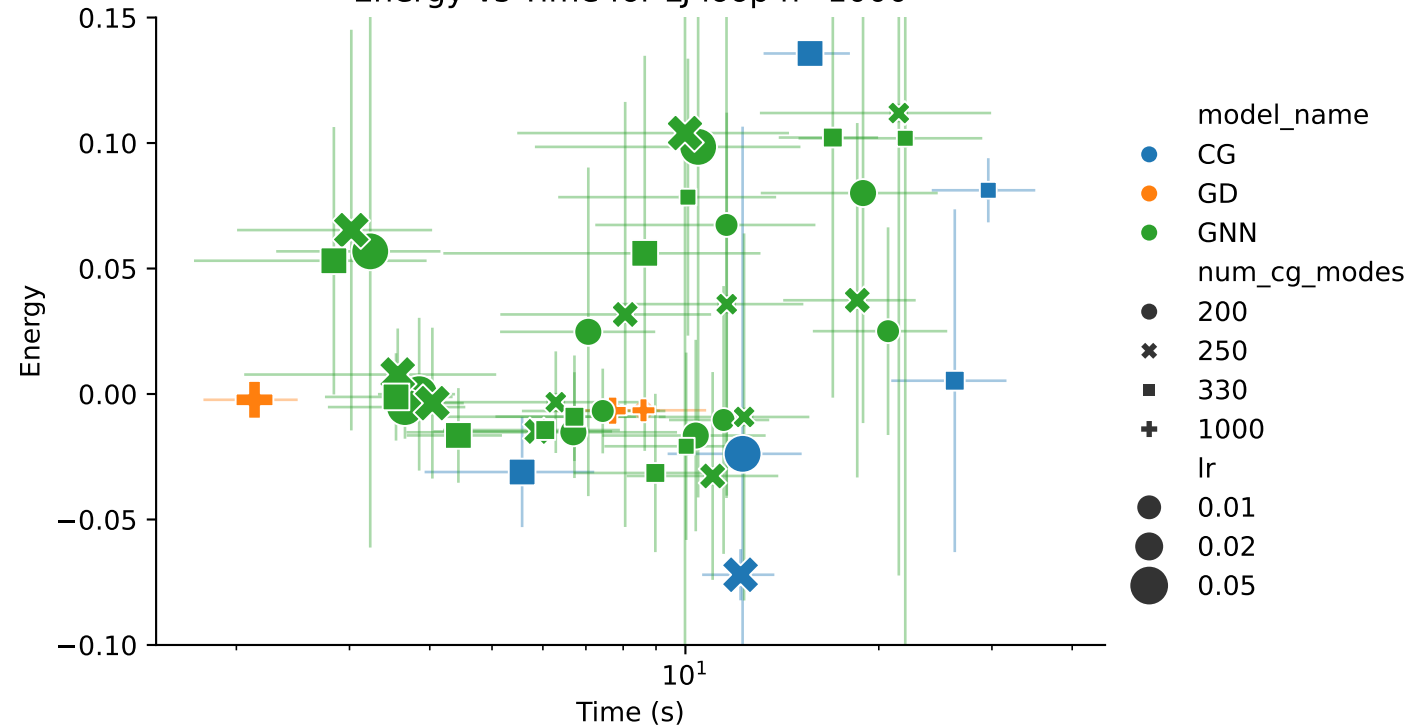

Supplement: supplementary_material [file attachment]
